# Supplementary material
Source: PubMed Central journal article supplement (PMC3973088)
Supplement: JCI72829sd.pdf [file JCI72829sd.pdf]

Supplementary Figure 1.

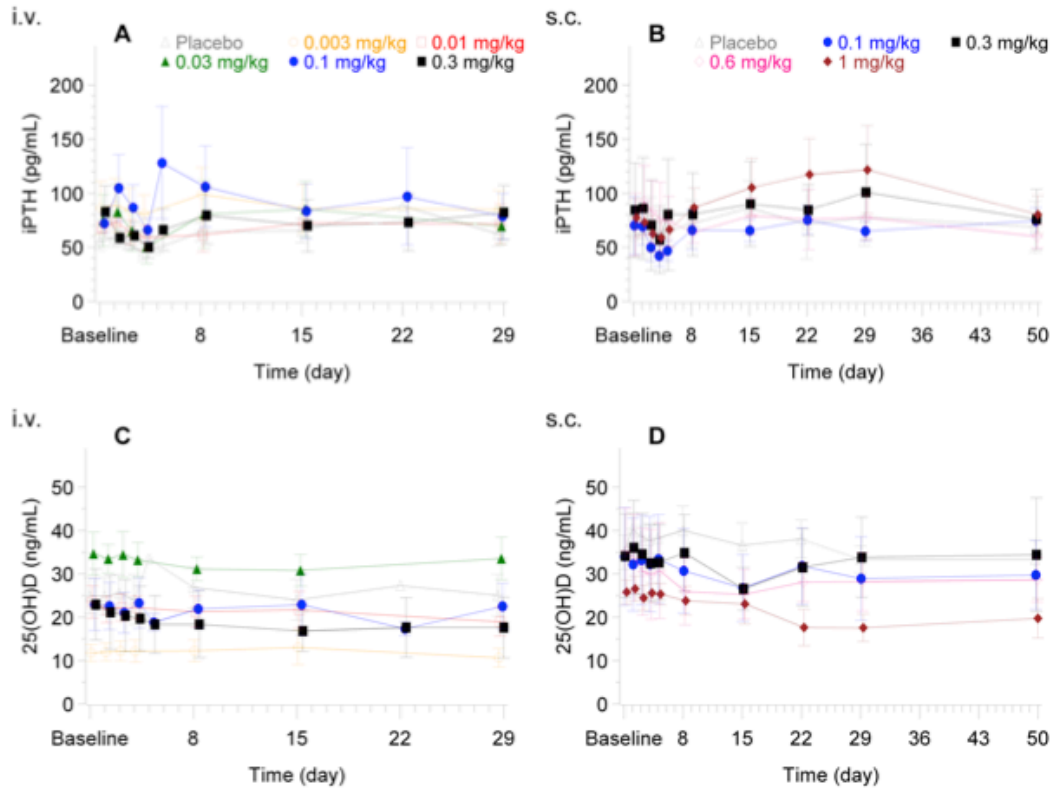

**Supplementary Figure 1.** Effect of i.v. and s.c administration KRN23 on serum iPTH and 25(OH)D compared to placebo. **A and B:** serum iPTH; **C and D:** serum 25(OH)D. For i.v. cohorts, six profiles are shown for panels A and C [placebo (grey), 0.003 (yellow), 0.01 (red), 0.03 (green), 0.1 (blue) and 0.3 mg/kg (black)]. For s.c. cohorts, 5 profiles are shown for panels B and D [placebo (grey), 0.1 (blue), 0.3 (black), 0.6 (pink) and 1.0 mg/kg (brown)]. Data are presented as mean  $\pm$  SEM.

Supplementary Figure 2.

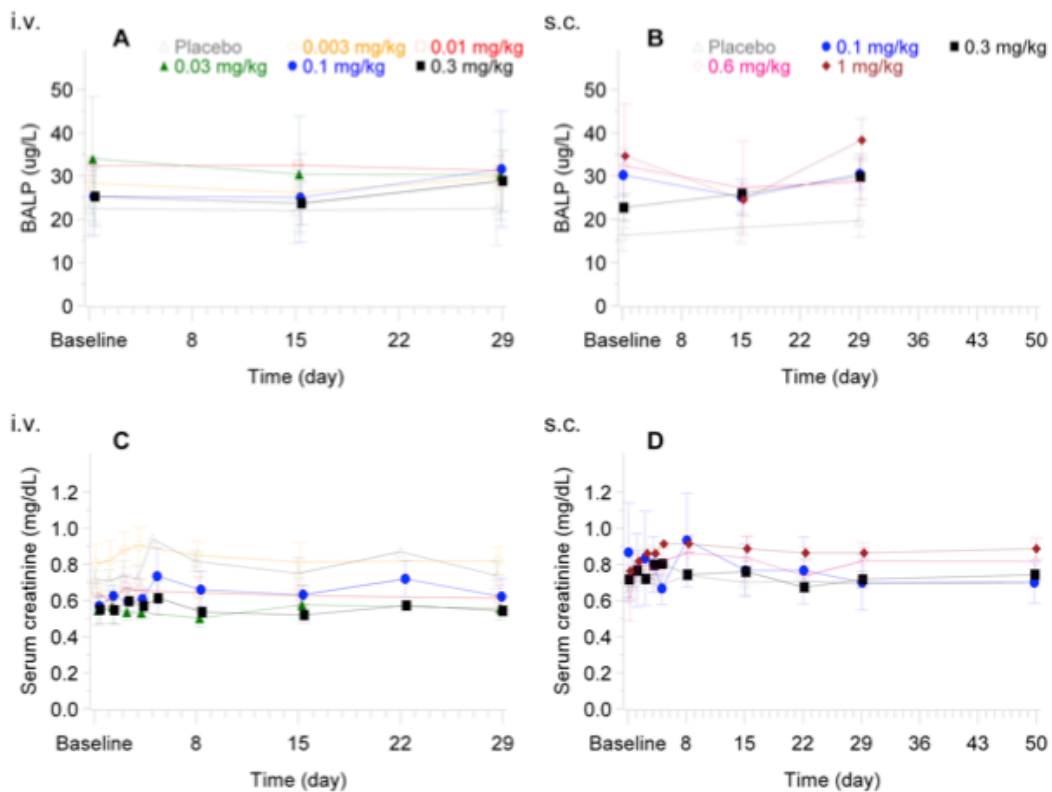

**Supplementary Figure 2.** Effect of i.v. and s.c administration KRN23 on serum BALP and creatinine compared to placebo. **A and B:** serum BALP; **C and D:** serum creatinine. For i.v. cohorts, six profiles are shown for panels A and C [placebo (grey), 0.003 (yellow), 0.01 (red), 0.03 (green), 0.1 (blue) and 0.3 mg/kg (black)]. For s.c. cohorts, 5 profiles are shown for panels B and D [placebo (grey), 0.1 (blue), 0.3 (black), 0.6 (pink) and 1.0 mg/kg (brown)]. Data are presented as mean  $\pm$  SEM.

**Supplemental Table 1.**

Summary of ANOVA for additional pharmacodynamic parameters following i.v. administration of KRN23

| <b>Parameters</b>              | <b>Dose Level (mg/kg)</b> | <b>Treatment Response vs Placebo Response <sup>A</sup></b> | <b>Lower Limit of 95% CI</b> | <b>Upper Limit of 95% CI</b> | <b>P-value (Pair-wise Comparison)</b> |
|--------------------------------|---------------------------|------------------------------------------------------------|------------------------------|------------------------------|---------------------------------------|
| <b>iPTH, pg/mL</b>             | 0.003                     | 4.3                                                        | -6.0                         | 14.6                         | 0.412                                 |
|                                | 0.01                      | -3.2                                                       | -13.5                        | 7.1                          | 0.537                                 |
|                                | 0.03                      | -2.1                                                       | -12.4                        | 8.1                          | 0.683                                 |
|                                | 0.1                       | 13.2                                                       | 4.5                          | 21.8                         | 0.003*                                |
|                                | 0.3                       | -15.8                                                      | -25.6                        | -6.1                         | 0.002*                                |
| <b>25(OH)D, ng/mL</b>          | 0.003                     | 0.20                                                       | -1.07                        | 1.47                         | 0.76                                  |
|                                | 0.01                      | -2.08                                                      | -3.35                        | -0.81                        | 0.001*                                |
|                                | 0.03                      | -1.17                                                      | -2.44                        | 0.10                         | 0.070                                 |
|                                | 0.1                       | 0.19                                                       | -0.88                        | 1.26                         | 0.727                                 |
|                                | 0.3                       | -2.87                                                      | -4.07                        | -1.66                        | <0.001*                               |
| <b>BALP, µg/L</b>              | 0.003                     | -0.16                                                      | -4.03                        | 3.72                         | 0.935                                 |
|                                | 0.01                      | -0.19                                                      | -4.07                        | 3.68                         | 0.922                                 |
|                                | 0.03                      | -2.27                                                      | -6.14                        | 1.61                         | 0.246                                 |
|                                | 0.1                       | 2.17                                                       | -1.19                        | 5.52                         | 0.201                                 |
|                                | 0.3                       | 0.82                                                       | -3.05                        | 4.69                         | 0.673                                 |
| <b>Serum creatinine, mg/dL</b> | 0.003                     | 0.006                                                      | -0.030                       | 0.041                        | 0.757                                 |
|                                | 0.01                      | -0.038                                                     | -0.074                       | -0.003                       | 0.032*                                |
|                                | 0.03                      | -0.042                                                     | -0.077                       | -0.006                       | 0.021*                                |
|                                | 0.1                       | 0.011                                                      | -0.018                       | 0.041                        | 0.452                                 |
|                                | 0.3                       | -0.045                                                     | -0.078                       | -0.011                       | 0.009*                                |

<sup>A</sup> Least squares mean difference in change from baseline between active and placebo treatment calculated from ANOVA model with dose and visit as explanatory variables. \* $P < 0.05$ .

**Supplemental Table 2.**

Summary of ANOVA for additional pharmacodynamic parameters following s.c. administration of KRN23

| <b>Parameters</b>              | <b>Dose Level (mg/kg)</b> | <b>Treatment Response vs Placebo Response<sup>A</sup></b> | <b>Lower Limit of 95% CI</b> | <b>Upper Limit of 95% CI</b> | <b>P-value (Pair-wise Comparison)</b> |
|--------------------------------|---------------------------|-----------------------------------------------------------|------------------------------|------------------------------|---------------------------------------|
| <b>iPTH, pg/mL</b>             | 0.1                       | -15.5                                                     | -23.8                        | -7.17                        | <0.001*                               |
|                                | 0.3                       | -10.8                                                     | -19.1                        | -2.48                        | 0.011*                                |
|                                | 0.6                       | -0.45                                                     | -8.79                        | 7.88                         | 0.915                                 |
|                                | 1                         | -2.98                                                     | -11.3                        | 5.36                         | 0.482                                 |
| <b>25(OH)D, ng/mL</b>          | 0.1                       | -4.70                                                     | -6.54                        | -2.87                        | <0.001*                               |
|                                | 0.3                       | -2.54                                                     | -4.37                        | -0.71                        | 0.007*                                |
|                                | 0.6                       | -6.41                                                     | -8.24                        | -4.57                        | <0.001*                               |
|                                | 1                         | -4.26                                                     | -6.10                        | -2.43                        | <0.001*                               |
| <b>BALP, µg/L</b>              | 0.1                       | -3.32                                                     | -8.24                        | 1.60                         | 0.181                                 |
|                                | 0.3                       | 1.72                                                      | -3.21                        | 6.64                         | 0.486                                 |
|                                | 0.6                       | -4.56                                                     | -9.49                        | 0.36                         | 0.068                                 |
|                                | 1                         | -3.85                                                     | -8.78                        | 1.07                         | 0.122                                 |
| <b>Serum creatinine, mg/dL</b> | 0.1                       | -0.13                                                     | -0.19                        | -0.078                       | <0.001*                               |
|                                | 0.3                       | -0.026                                                    | -0.082                       | 0.031                        | 0.366                                 |
|                                | 0.6                       | 0.130                                                     | 0.073                        | 0.186                        | <0.001*                               |
|                                | 1                         | 0.030                                                     | -0.026                       | 0.086                        | 0.296                                 |

<sup>A</sup> Least squares mean difference in change from baseline between active and placebo treatment calculated from ANOVA model with dose and visit as explanatory variables. \* $P < 0.05$ .
